# Supplementary material for: Amplified electrochemical genotyping of single-nucleotide polymorphisms using a graphene–gold nanoparticles modified glassy carbon platform
Source: Royal Society of Chemistry journal article supplement (doi:10.1039/c5ra03794h), 2015-01-01
Supplement: c5ra03794h1.pdf [file c5ra03794h1.pdf]

## Supplementary Information

### **Amplified Electrochemical Genotyping of Single-Nucleotide Polymorphisms using Graphene-Gold Nanoparticles Modified Glassy Carbon Platform**

*Seyyed Mehdi khoshfetrat, Masoud A. Mehrgardi<sup>1</sup>*

Department of chemistry, University of Isfahan, Isfahan 81746-73441, Iran.

---

<sup>1</sup> Corresponding author. Tel.: +98 3117932710; fax: +98 3116689732.

E-mail addresses: [m.mehrgardi@chem.ui.ac.ir](mailto:m.mehrgardi@chem.ui.ac.ir), m.mehrgardi@gmail.com (M.A.Mehrgardi)

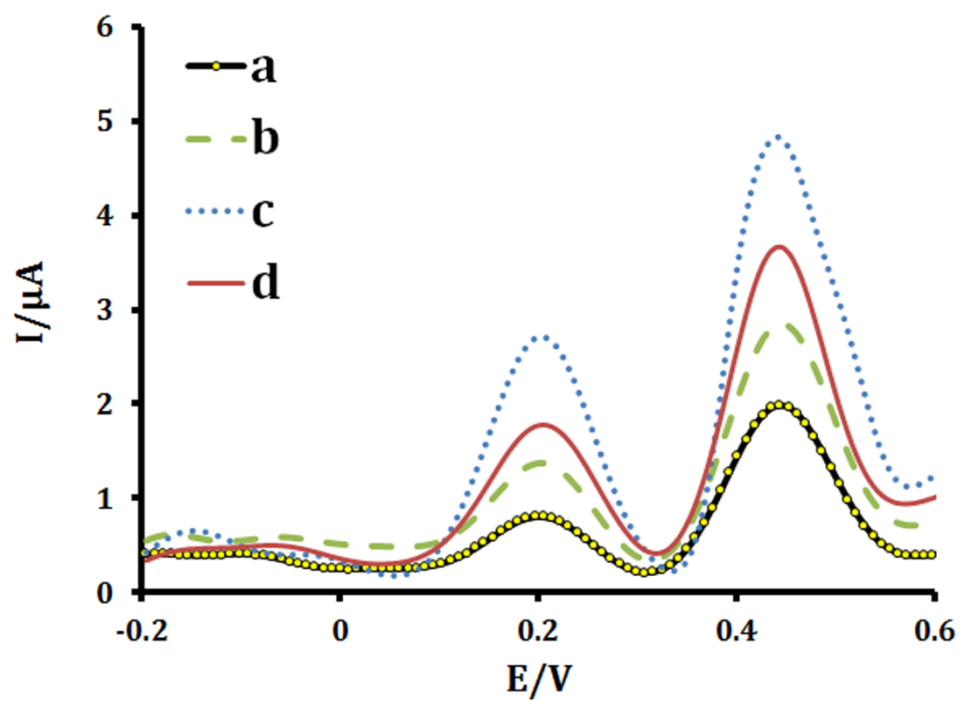

**Figure S1.** DPV of the A-C mismatch-modified GR-AuNPs/GCE when the treated with T-AgNPs/G-Au-DABA at different deposition time. (a) 50 s, (b) 70 s, (c) 90 s, (d) 120 s.

**Table S1.** Confirmation test of linearity

G-T (10-1700 pM)

| Source of variation | Sum of squares | Degrees of freedom | Mean squares | Fisher ratio | F <sub>crit</sub> | Conclusion          |
|---------------------|----------------|--------------------|--------------|--------------|-------------------|---------------------|
| Regression          | 441.631        | 1                  | 441.631      | 1510.475     | 4.381             | Regression Accepted |
| Residual            | 5.552          | 19                 | 0.292        |              |                   |                     |
| Lack of fit         | 1.928          | 5                  | 0.385        | 1.488        | 2.958             | Linearity Accepted  |
| Pure error          | 3.627          | 14                 | 0.259        |              |                   |                     |
| Total               | 447.186        | 20                 |              |              |                   |                     |

A-C (20-1200 pM)

| Source of variation | Sum of squares | Degrees of freedom | Mean squares | Fisher ratio | F <sub>crit</sub> | Conclusion          |
|---------------------|----------------|--------------------|--------------|--------------|-------------------|---------------------|
| Regression          | 44.270         | 1                  | 44.270       | 689.642      | 4.494             | Regression Accepted |
| Residual            | 1.027          | 16                 | 0.064        |              |                   |                     |
| Lack of fit         | 0.394          | 4                  | 0.098        | 1.869        | 3.259             | Linearity Accepted  |
| Pure error          | 0.636          | 12                 | 0.053        |              |                   |                     |
| Total               | 45.298         | 17                 |              |              |                   |                     |
